# Supplementary material
Source: Springer Nature journal article supplement (https://www.springermedizin.de/resource/supplementary/13058_2010_9541_MOESM13_ESM.pdf/9702208)

**A.**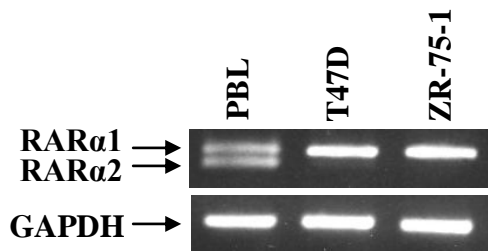**B.**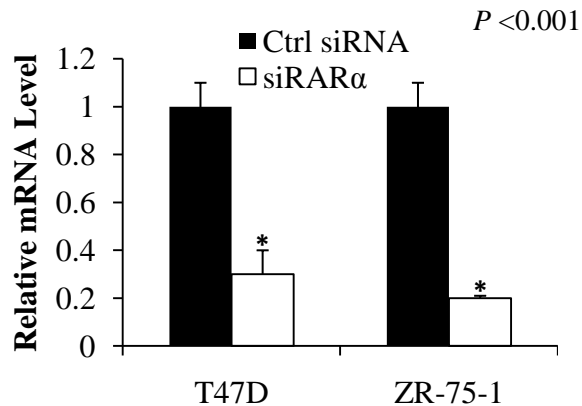**C.**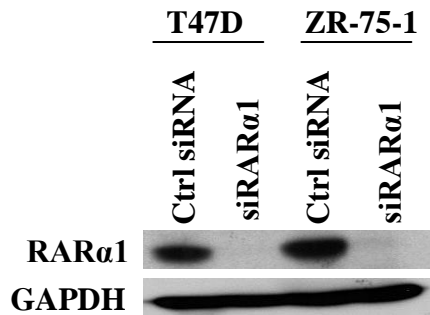**D.**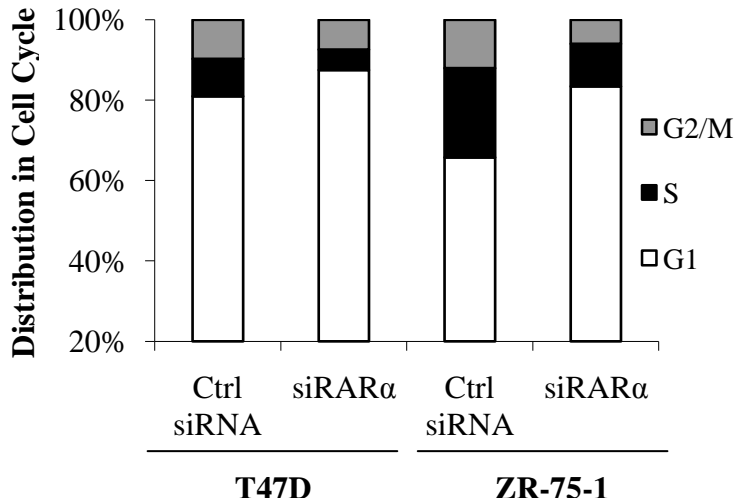

Supplement: MOESM13 [file 9702208]
